# Supplementary material for: A new resonance Rayleigh scattering method for the determination of trace O3 in air using rhodamine 6G as probe
Source: Royal Society of Chemistry journal article supplement (doi:10.1039/c3ra00020f), 2013-01-01
Supplement: c3ra00020f.pdf [file c3ra00020f.pdf]

# A new resonance Rayleigh scattering method for the determination of trace $O_3$ in air using rhodamine 6G as probe

Chenyin Lin, Guiqing Wen, Aihui Liang, Zhiliang Jiang\*

(Key Laboratory of Ecology of Rare and Endangered Species and Environmental Conservation of  
Education Ministry; Guangxi Key Laboratory of Environmental Pollution Control Theory and  
Technology; Guangxi Normal University, Guilin 541004, China)

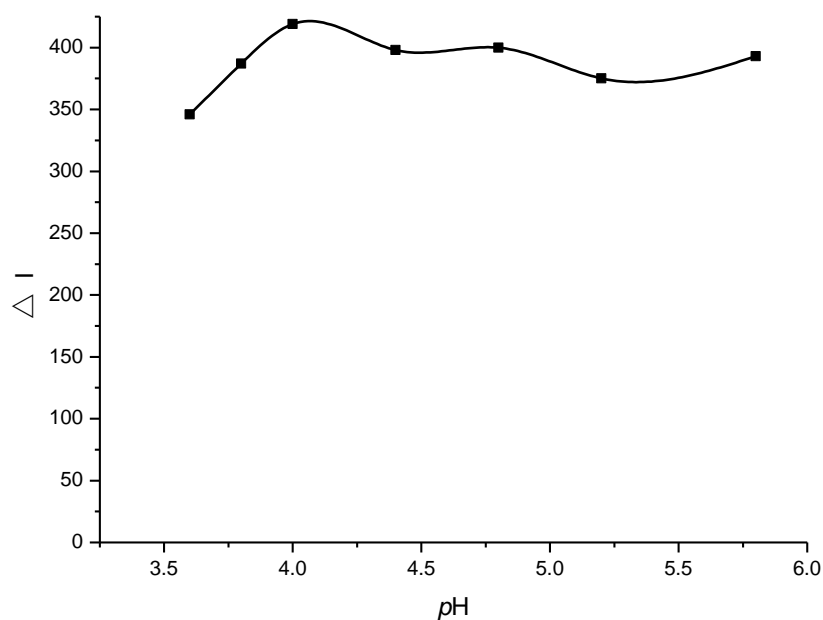

Fig. 1S Effect of HAc-NaAc buffer solution pH value on the  $\Delta I$

The RRS intensity at 418 nm of Rh6G associated particle (2.0mM BKL, 66.7 $\mu$ M Rh6G) in the presence of 20 $\mu$ M  $O_3$ .

Table 1S Comparison of some spectrophotometric methods for O<sub>3</sub>

| Methods                          | Principle                                                                          | LR( $\mu$ M) | DL ( $\mu$ M) | Comments                        | Ref.        |
|----------------------------------|------------------------------------------------------------------------------------|--------------|---------------|---------------------------------|-------------|
| Spectrophotometry                | $O_3 + 3I^- + 2H^+ = I_3^- + O_2 + H_2O$                                           | 5-70         | 5             | Simple, low sensitivity         | 2           |
| Flow injection spectrophotometry | Based on the iodine-starch coloring at 580 nm.                                     | 8.3-220      | 8.3           | Rapid, low sensitivity.         | 3           |
| Spectrophotometry                | Using the reaction between O <sub>3</sub> and bis(terpyridine)Fe(II).              | 1-400        | 1             | Simple, sensitive.              | 28          |
| Spectrophotometry                | Based on sodium indigo disulfonate fading at 610 nm.                               | 2.5-62.5     | 2.5           | Simple, sensitive.              | 29          |
| RRS                              | Based on the RRS effect of (Rh6G-I <sub>3</sub> ) <sub>n</sub> particle at 418 nm. | 0.25-25      | 0.07          | Sensitive, selective and rapid. | This method |

Table 2S Effect of coexistence ions

| Coexistent ions              | Tolerance (mol/L)    | Relative error (%) | Coexistent ions               | Tolerance (mol/L)    | Relative error (%) |
|------------------------------|----------------------|--------------------|-------------------------------|----------------------|--------------------|
| NO <sub>2</sub> <sup>-</sup> | 3.2×10 <sup>-4</sup> | 5.0                | H <sub>2</sub> O <sub>2</sub> | 3.2×10 <sup>-4</sup> | 6.0                |
| Mn <sup>2+</sup>             | 7.0×10 <sup>-4</sup> | -4.8               | Ba <sup>2+</sup>              | 6.0×10 <sup>-4</sup> | -5.4               |
| Cu <sup>2+</sup>             | 6.0×10 <sup>-4</sup> | -6.0               | Fe <sup>3+</sup>              | 8.5×10 <sup>-5</sup> | 4.5                |
| Ca <sup>2+</sup>             | 6.5×10 <sup>-4</sup> | -5.2               | Zn <sup>2+</sup>              | 8.0×10 <sup>-5</sup> | -4.9               |
| Mg <sup>2+</sup>             | 6.5×10 <sup>-4</sup> | -4.2               | SO <sub>3</sub> <sup>2+</sup> | 8.0×10 <sup>-5</sup> | -4.8               |
